# Supplementary material for: Neoantigen-specific stem cell memory-like CD4+ T cells mediate CD8+ T cell-dependent immunotherapy of MHC class II-negative solid tumors
Source: Springer Nature journal article supplement (doi:10.1038/s41590-023-01543-9), 2023-07-03
Supplement: MOESM1 [file 41590_2023_1543_MOESM1_ESM.pdf]

Reporting Summary

Nature Portfolio wishes to improve the reproducibility of the work that we publish. This form provides structure for consistency and transparency in reporting. For further information on Nature Portfolio policies, see our [Editorial Policies](#) and the [Editorial Policy Checklist](#).

Statistics

For all statistical analyses, confirm that the following items are present in the figure legend, table legend, main text, or Methods section.

| n/a                                 | Confirmed                                                                                                                                                                                                                                                                                      |
|-------------------------------------|------------------------------------------------------------------------------------------------------------------------------------------------------------------------------------------------------------------------------------------------------------------------------------------------|
| <input type="checkbox"/>            | <input checked="" type="checkbox"/> The exact sample size ( <i>n</i> ) for each experimental group/condition, given as a discrete number and unit of measurement                                                                                                                               |
| <input type="checkbox"/>            | <input checked="" type="checkbox"/> A statement on whether measurements were taken from distinct samples or whether the same sample was measured repeatedly                                                                                                                                    |
| <input type="checkbox"/>            | <input checked="" type="checkbox"/> The statistical test(s) used AND whether they are one- or two-sided<br><i>Only common tests should be described solely by name; describe more complex techniques in the Methods section.</i>                                                               |
| <input type="checkbox"/>            | <input checked="" type="checkbox"/> A description of all covariates tested                                                                                                                                                                                                                     |
| <input type="checkbox"/>            | <input checked="" type="checkbox"/> A description of any assumptions or corrections, such as tests of normality and adjustment for multiple comparisons                                                                                                                                        |
| <input type="checkbox"/>            | <input checked="" type="checkbox"/> A full description of the statistical parameters including central tendency (e.g. means) or other basic estimates (e.g. regression coefficient) AND variation (e.g. standard deviation) or associated estimates of uncertainty (e.g. confidence intervals) |
| <input type="checkbox"/>            | <input checked="" type="checkbox"/> For null hypothesis testing, the test statistic (e.g. <i>F</i> , <i>t</i> , <i>r</i> ) with confidence intervals, effect sizes, degrees of freedom and <i>P</i> value noted<br><i>Give P values as exact values whenever suitable.</i>                     |
| <input checked="" type="checkbox"/> | <input type="checkbox"/> For Bayesian analysis, information on the choice of priors and Markov chain Monte Carlo settings                                                                                                                                                                      |
| <input checked="" type="checkbox"/> | <input type="checkbox"/> For hierarchical and complex designs, identification of the appropriate level for tests and full reporting of outcomes                                                                                                                                                |
| <input type="checkbox"/>            | <input checked="" type="checkbox"/> Estimates of effect sizes (e.g. Cohen's <i>d</i> , Pearson's <i>r</i> ), indicating how they were calculated                                                                                                                                               |

Our web collection on [statistics for biologists](#) contains articles on many of the points above.

Software and code

Policy information about [availability of computer code](#)

|                 |                                                                                                                                                                                                                                                                                                                                                                      |
|-----------------|----------------------------------------------------------------------------------------------------------------------------------------------------------------------------------------------------------------------------------------------------------------------------------------------------------------------------------------------------------------------|
| Data collection | BD FACSDiva was used to collect flow cytometry data                                                                                                                                                                                                                                                                                                                  |
| Data analysis   | Flow cytometry data were analyzed using FlowJo v10.8.2. Data analysis, visualization, and statistical analyses were performed with Prism 9. For RNA-seq data, the following analysis packages were used: FastQC (v0.11.9), Trimmomatic (v0.32), STAR (v2.6.1c) , PRINSEQ Lite (v 0.20.3), SAMtools (v1.17), featureCounts (v1.6.5), DESeq2 (1.24.0), ComBat (3.32.1) |

For manuscripts utilizing custom algorithms or software that are central to the research but not yet described in published literature, software must be made available to editors and reviewers. We strongly encourage code deposition in a community repository (e.g. GitHub). See the Nature Portfolio [guidelines for submitting code & software](#) for further information.

Data

Policy information about [availability of data](#)

All manuscripts must include a [data availability statement](#). This statement should provide the following information, where applicable:

- Accession codes, unique identifiers, or web links for publicly available datasets
- A description of any restrictions on data availability
- For clinical datasets or third party data, please ensure that the statement adheres to our [policy](#)

Data Availability Statement: Bulk RNA-seq data has been uploaded to NCBI GEO and is accessible under accession number GSE229221. Source data are provided with this article.

## Human research participants

Policy information about [studies involving human research participants and Sex and Gender in Research](#).

|                             |     |
|-----------------------------|-----|
| Reporting on sex and gender | N/A |
| Population characteristics  | N/A |
| Recruitment                 | N/A |
| Ethics oversight            | N/A |

Note that full information on the approval of the study protocol must also be provided in the manuscript.

## Field-specific reporting

Please select the one below that is the best fit for your research. If you are not sure, read the appropriate sections before making your selection.

☒ Life sciences ☐ Behavioural & social sciences ☐ Ecological, evolutionary & environmental sciences

For a reference copy of the document with all sections, see [nature.com/documents/nr-reporting-summary-flat.pdf](https://nature.com/documents/nr-reporting-summary-flat.pdf)

## Life sciences study design

All studies must disclose on these points even when the disclosure is negative.

|                 |                                                                                                                                                                                                                                                                                                              |
|-----------------|--------------------------------------------------------------------------------------------------------------------------------------------------------------------------------------------------------------------------------------------------------------------------------------------------------------|
| Sample size     | Sample sizes for animal experiments were chosen in line with published results for similar experiments.                                                                                                                                                                                                      |
| Data exclusions | No data were excluded from this study.                                                                                                                                                                                                                                                                       |
| Replication     | All experiments were replicated at least once with number of replicate experiments indicated in the figure legends.                                                                                                                                                                                          |
| Randomization   | For therapeutic animal experiments, mice were randomized prior to treatment initiation to account for variation in tumor size. For prophylactic experiments where treatments were administered prior to tumor initiation, animals of the same age were used and separate cages received separate treatments. |
| Blinding        | Blinding was not possible for in vivo tumor studies as tumor measurements were only taken by one researcher. For all other experiments blinding was not necessary.                                                                                                                                           |

## Reporting for specific materials, systems and methods

We require information from authors about some types of materials, experimental systems and methods used in many studies. Here, indicate whether each material, system or method listed is relevant to your study. If you are not sure if a list item applies to your research, read the appropriate section before selecting a response.

### Materials & experimental systems

### Methods

| n/a                                 | Involved in the study                                           | n/a                                 | Involved in the study                              |
|-------------------------------------|-----------------------------------------------------------------|-------------------------------------|----------------------------------------------------|
| <input type="checkbox"/>            | <input checked="" type="checkbox"/> Antibodies                  | <input checked="" type="checkbox"/> | <input type="checkbox"/> ChIP-seq                  |
| <input type="checkbox"/>            | <input checked="" type="checkbox"/> Eukaryotic cell lines       | <input type="checkbox"/>            | <input checked="" type="checkbox"/> Flow cytometry |
| <input checked="" type="checkbox"/> | <input type="checkbox"/> Palaeontology and archaeology          | <input checked="" type="checkbox"/> | <input type="checkbox"/> MRI-based neuroimaging    |
| <input type="checkbox"/>            | <input checked="" type="checkbox"/> Animals and other organisms |                                     |                                                    |
| <input checked="" type="checkbox"/> | <input type="checkbox"/> Clinical data                          |                                     |                                                    |
| <input checked="" type="checkbox"/> | <input type="checkbox"/> Dual use research of concern           |                                     |                                                    |

### Antibodies

|                 |                                                                                                                                                                                                                                                                                                                                                                                                                                                                                                                                                                                                                                            |
|-----------------|--------------------------------------------------------------------------------------------------------------------------------------------------------------------------------------------------------------------------------------------------------------------------------------------------------------------------------------------------------------------------------------------------------------------------------------------------------------------------------------------------------------------------------------------------------------------------------------------------------------------------------------------|
| Antibodies used | Fluorescently conjugated antibodies specific for the following murine antigens were used in this study: CD45 (30-F11, 103131, Biolegend), CD4 (RM4-5, 100509, Biolegend), Thy1-1 (OX-7, 202523, Biolegend), TRBV8.3 (1B3.3, 553663, BD Biosciences), PD-1 (29F.1A12, 135219, Biolegend), CD69 (H1.2F3, 104513, Biolegend), TRBV14 (J9.19, 553258, BD Biosciences), TRBV4 (KT4, 553365, BD Biosciences), TCRb (H57-597, 20-5961, Tonbo), pERK1/2 (4B11B69, 675507, Biolegend), I-A/I-E (M5/114.15.2, 17-5321-82, eBiosciences), B220 (RA3-6B2, 25-0452-82, Invitrogen), CD3 (17A2, 100217, Biolegend), CD62L (MEL-14, 20-0621-U025, Tonbo), |
|-----------------|--------------------------------------------------------------------------------------------------------------------------------------------------------------------------------------------------------------------------------------------------------------------------------------------------------------------------------------------------------------------------------------------------------------------------------------------------------------------------------------------------------------------------------------------------------------------------------------------------------------------------------------------|

CD44 (IM7, 561860, BD Biosciences), Ly-6A/E (F13-161.7, 108123, Biolegend), CD8 (53-6.7, 35-0081-U025, Tonbo), CD40L (MR1, 106505, Biolegend). All surface staining antibodies listed were used at a 1:200 dilution. Anti-pERK1/2 antibody was used at a 1:50 dilution for intracellular staining.

The following antibodies were used for in vivo depletions/blockades: anti-CD8 (116-13.1, BE0118, BioXCELL), IgG2a (C1.18.4, BE0085, BioXCELL), anti-CD40L (MR1, BE0017-1, BioXCELL), Armenian hamster IgG (PIP, BE0260, BioXCELL)

#### Validation

All antibodies were validated for use in mice and for the indicated applications on the manufacturers websites (flow cytometry, in vivo depletion for 116-13.1, in vivo blocking for MR1.)

## Eukaryotic cell lines

Policy information about [cell lines and Sex and Gender in Research](#)

#### Cell line source(s)

SCC VII tumor cell lines were a gift from Michael Beckett (mbeckett@uchicago.edu) and originally derived from a spontaneous murine abdominal wall tumor in the lab of Dr. Herman Suit at Harvard University. 58a-b- were a gift from Bernard Malissen (bernardm@ciml.univ-mrs.fr)

#### Authentication

Cell lines were not authenticated

#### Mycoplasma contamination

All cell lines tested negative for mycoplasma

#### Commonly misidentified lines (See [ICLAC](#) register)

No commonly misidentified cell lines were used.

## Animals and other research organisms

Policy information about [studies involving animals](#); [ARRIVE guidelines](#) recommended for reporting animal research, and [Sex and Gender in Research](#)

#### Laboratory animals

8-12 week old female C3H/HeJ mice were used in these studies

#### Wild animals

This study did not involve wild animals

#### Reporting on sex

Female mice were used because the tumor cell line (SCC VII) was derived from a female mouse

#### Field-collected samples

This study did not involve field collected samples

#### Ethics oversight

The animal study protocol was approved by the La Jolla Institute for Immunology Institutional Animal Care and Use Committee (IACUC)

Note that full information on the approval of the study protocol must also be provided in the manuscript.

## Flow Cytometry

### Plots

Confirm that:

- ☒ The axis labels state the marker and fluorochrome used (e.g. CD4-FITC).
- ☒ The axis scales are clearly visible. Include numbers along axes only for bottom left plot of group (a 'group' is an analysis of identical markers).
- ☒ All plots are contour plots with outliers or pseudocolor plots.
- ☒ A numerical value for number of cells or percentage (with statistics) is provided.

### Methodology

#### Sample preparation

Samples were prepared as described in the materials and methods. Mouse spleens, tumors, and inguinal lymph nodes were surgically removed. Spleens were dissociated manually and cell suspensions were passed through a 70 uM strainer. Prior to use as antigen presenting cells in T cell in vitro assays, red blood cells were lysed with ACK lysis buffer. Lymph nodes and subcutaneous tumors were minced into small (<2mm) pieces with dissection scissors. Tissue fragments were enzymatically dissociated in 20 ug/mL Liberase (Roche) and 20 ug/mL DNase I (Roche) at 37 degrees C for 30 minutes. Single cells were then passed through a 70 uM strainer.

#### Instrument

BD LSR-II and BD FACS Celesta were used for data acquisition

#### Software

Flow cytometry data was collected using BD FACSDiva software and analyzed with FlowJo v10.8.2

#### Cell population abundance

For tetramer sorting experiments, given the low total number of cells, no post-sort purity assessment was made and all single cells were used for TCR sequencing experiments.

## Gating strategy

Where relevant, gating strategies have been included as supplemental figures. Tetramer binding CD4+ T cells from mice were pre-gated as live, B220-, CD3+, mTCRb+, CD8-, CD4+ cells. In adoptive transfer experiments, transferred TCR-engineered CD4+ T cells were identified as live, CD45+, CD4+, CD90.1+ cells.

☒ Tick this box to confirm that a figure exemplifying the gating strategy is provided in the Supplementary Information.
